# Supplementary material for: Introducing organosilicone source into the synthetic system of polyoxovanadates: two novel {V15Si6O48}-based extended chains
Source: Royal Society of Chemistry journal article supplement (doi:10.1039/c1dt11417d), 2011-11-03
Supplement: c1dt11417d.pdf [file c1dt11417d.pdf]

## Electronic Supplementary Information

### Introducing organosilicone source into the synthetic system of polyoxovanadates: two novel $\{V_{15}Si_6O_{48}\}$ -based extended chains

Yuanzhe Gao,<sup>a,b</sup> Yanqing Xu, \*<sup>a</sup> Yu Cao,<sup>a</sup> and ChangWen Hu\*<sup>a</sup>

<sup>a</sup> School of Chemistry, Beijing Institute of Technology and Key Laboratory of Cluster Science, Ministry of Education of China, Beijing, 100081, P. R. China.

<sup>b</sup> College of Chemistry and Material Science, Hebei Normal University, Shijiazhuang, Hebei, 050016, China.

#### Contents

**Fig. S1** a) Ball-and-stick representation of the cluster  $\{V^{IV}_{15}Si_6\}$ . b) The layered structure of the  $\{V^{IV}_{15}Si_6\}$  cluster within which all metal ions are placed in an arrangement of a central large ring sandwiched by two hexagons.

**Fig. S2** IR spectra of **1** and **2**.

**Fig. S3** XPS spectra: a) for  $V^{IV}$ - $V^V$  in compound **1** and b) for  $V^{IV}$  in compound **2**.

**Table S1** Selected Bond Distances (Å) for Compound **1** and **2**

**Table S2** Bond balance sum calculations for Compound **1** and **2**

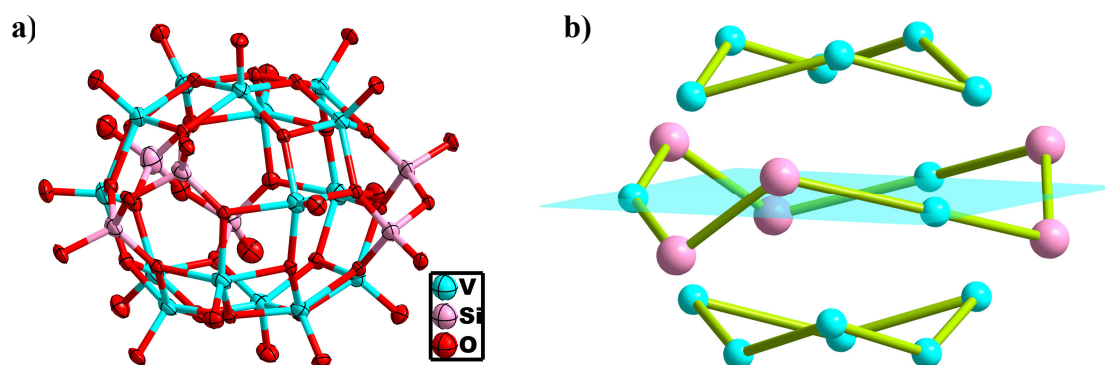

**Fig. S1** a) Ball-and-stick representation of the cluster  $\{V^{IV}_{15}Si_6\}$ . b) The layered structure of the  $\{V^{IV}_{15}Si_6\}$  cluster within which all metal ions are placed in an arrangement of a central large ring sandwiched by two hexagons.

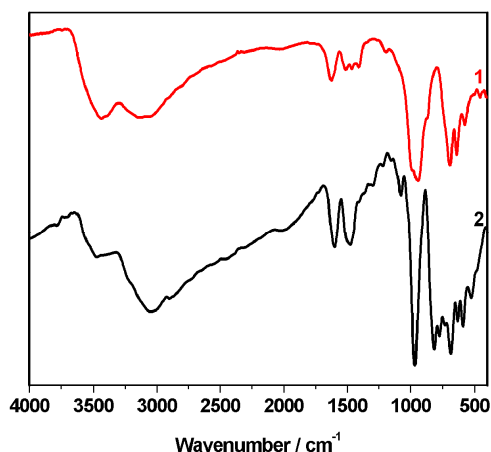

Fig. S2 IR spectra of compounds 1 and 2.

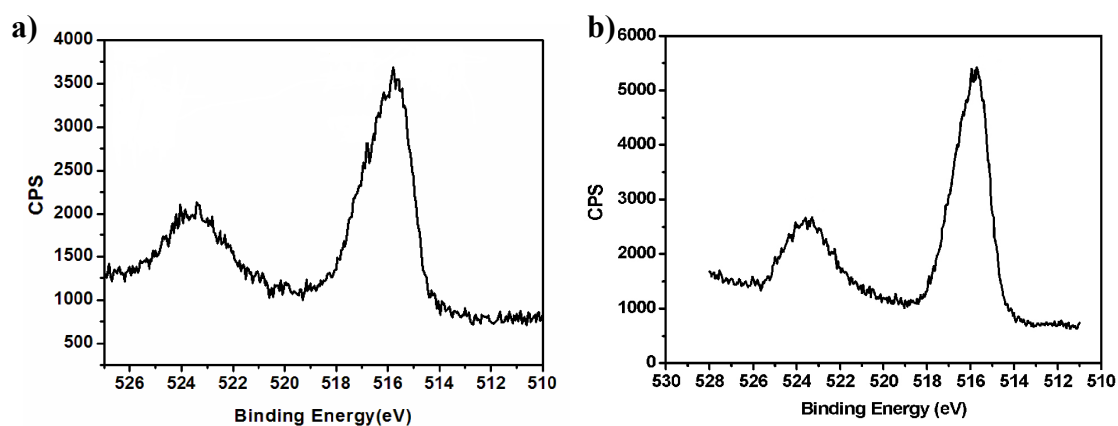

Fig. S3 XPS spectra: a) for V<sup>IV</sup>-V<sup>V</sup> in compound 1 and b) for V<sup>IV</sup> in compound 2 .

Table S1 Selected Bond Distances (Å) for Compound 1 and 2

**Compound 1**

|              |            |              |            |
|--------------|------------|--------------|------------|
| V(1)-O(1)    | 1.622(5)   | V(6)-O(15)   | 1.921(5)   |
| V(1)-O(18)#1 | 1.923(5)   | V(6)-O(13)   | 1.936(5)   |
| V(1)-O(15)#1 | 1.924(5)   | V(6)-O(10)   | 1.939(6)   |
| V(1)-O(2)    | 1.928(5)   | V(6)-O(16)   | 2.002(5)   |
| V(1)-O(3)    | 2.011(5)   | V(6)-V(7)    | 3.0268(18) |
| V(1)-V(7)#1  | 2.8284(17) | V(7)-O(17)   | 1.611(5)   |
| V(1)-V(2)    | 3.0226(17) | V(7)-O(15)   | 1.903(5)   |
| V(2)-O(4)    | 1.616(6)   | V(7)-O(18)   | 1.913(5)   |
| V(2)-O(2)    | 1.897(5)   | V(7)-O(16)   | 2.003(5)   |
| V(2)-O(5)    | 1.918(6)   | V(7)-O(19)   | 2.011(5)   |
| V(2)-O(3)    | 1.992(5)   | V(7)-V(1)#1  | 2.8284(17) |
| V(2)-O(6)    | 2.008(5)   | V(7)-V(8)    | 3.0051(14) |
| V(2)-V(3)    | 2.8684(19) | V(8)-O(20)   | 1.590(8)   |
| V(2)-V(4)    | 3.0022(18) | V(8)-O(18)   | 1.929(5)   |
| V(3)-O(7)    | 1.602(6)   | V(8)-O(18)#1 | 1.929(5)   |

|              |            |               |            |
|--------------|------------|---------------|------------|
| V(3)-O(2)    | 1.927(5)   | V(8)-O(19)#1  | 1.992(5)   |
| V(3)-O(5)    | 1.955(5)   | V(8)-O(19)    | 1.992(5)   |
| V(3)-O(13)#1 | 1.959(5)   | V(8)-V(7)#1   | 3.0051(14) |
| V(3)-O(8)    | 2.005(6)   | V(9)-O(26)    | 1.622(8)   |
| V(3)-V(5)#1  | 3.018(2)   | V(9)-O(24)    | 1.638(7)   |
| V(4)-O(9)    | 1.597(6)   | V(9)-O(25)    | 1.794(5)   |
| V(4)-O(10)   | 1.925(6)   | V(9)-O(27)    | 1.814(6)   |
| V(4)-O(5)    | 1.938(5)   | Si(1)-O(25)#2 | 1.605(6)   |
| V(4)-O(11)   | 1.990(6)   | Si(1)-O(19)   | 1.619(5)   |
| V(4)-O(6)    | 1.998(5)   | Si(1)-O(21)   | 1.622(5)   |
| V(4)-V(5)    | 2.9853(19) | Si(1)-O(3)    | 1.622(5)   |
| V(5)-O(12)   | 1.608(6)   | Si(2)-O(27)   | 1.610(5)   |
| V(5)-O(10)   | 1.913(5)   | Si(2)-O(6)    | 1.618(6)   |
| V(5)-O(13)   | 1.921(6)   | Si(2)-O(16)   | 1.623(5)   |
| V(5)-O(11)   | 1.986(6)   | Si(2)-O(21)   | 1.649(5)   |
| V(5)-O(8)#1  | 1.990(6)   | Si(3)-O(23)   | 1.610(7)   |
| V(5)-V(6)    | 2.895(2)   | Si(3)-O(8)    | 1.627(6)   |
| V(5)-V(3)#1  | 3.018(2)   | Si(3)-O(11)   | 1.638(6)   |
| V(6)-O(14)   | 1.613(5)   | Si(3)-O(22)   | 1.641(5)   |

Symmetry transformations used to generate equivalent atoms:

(#1):  $-x+1, y, -z+3/2$ ; (#2):  $-x+1, -y, -z+1$ .

### Compound 2

|            |            |             |            |
|------------|------------|-------------|------------|
| V(1)-O(1)  | 1.622(5)   | V(9)-O(25)  | 1.996(5)   |
| V(1)-O(3)  | 1.917(5)   | V(9)-V(10)  | 3.0128(18) |
| V(1)-O(5)  | 1.933(5)   | V(10)-O(27) | 1.610(6)   |
| V(1)-O(4)  | 1.954(5)   | V(10)-O(24) | 1.912(5)   |
| V(1)-O(2)  | 2.002(5)   | V(10)-O(47) | 1.914(5)   |
| V(1)-V(12) | 2.8783(16) | V(10)-O(25) | 1.978(5)   |
| V(1)-V(2)  | 2.9994(16) | V(10)-O(29) | 2.010(5)   |
| V(2)-O(6)  | 1.616(6)   | V(10)-V(15) | 2.9926(19) |
| V(2)-O(3)  | 1.924(5)   | V(11)-O(30) | 1.608(6)   |
| V(2)-O(46) | 1.932(5)   | V(11)-O(31) | 1.941(5)   |
| V(2)-O(2)  | 1.976(5)   | V(11)-O(46) | 1.941(5)   |
| V(2)-O(7)  | 1.997(5)   | V(11)-O(3)  | 1.953(5)   |
| V(2)-V(11) | 2.8884(17) | V(11)-O(32) | 2.025(5)   |
| V(2)-V(6)  | 3.0129(16) | V(11)-V(14) | 3.0425(17) |
| V(3)-O(9)  | 1.618(5)   | V(12)-O(48) | 1.619(6)   |
| V(3)-O(12) | 1.908(5)   | V(12)-O(5)  | 1.918(5)   |
| V(3)-O(4)  | 1.931(5)   | V(12)-O(4)  | 1.930(5)   |
| V(3)-O(10) | 1.975(5)   | V(12)-O(11) | 1.978(5)   |
| V(3)-O(11) | 1.978(5)   | V(12)-O(34) | 1.990(5)   |
| V(3)-V(4)  | 2.9881(17) | V(12)-V(13) | 3.0197(16) |
| V(3)-V(12) | 2.9907(17) | V(13)-O(8)  | 1.611(5)   |

|               |            |             |            |
|---------------|------------|-------------|------------|
| V(4)-O(13)    | 1.599(6)   | V(13)-O(31) | 1.930(5)   |
| V(4)-O(15)    | 1.901(5)   | V(13)-O(33) | 1.934(5)   |
| V(4)-O(12)    | 1.920(5)   | V(13)-O(5)  | 1.946(5)   |
| V(4)-O(14)    | 1.997(5)   | V(13)-O(34) | 2.007(5)   |
| V(4)-O(10)    | 2.003(5)   | V(13)-V(14) | 2.8740(17) |
| V(4)-V(9)     | 2.8565(17) | V(14)-O(35) | 1.608(6)   |
| V(4)-V(5)     | 3.0197(16) | V(14)-O(31) | 1.918(5)   |
| V(5)-O(16)    | 1.615(5)   | V(14)-O(33) | 1.924(5)   |
| V(5)-O(15)    | 1.933(5)   | V(14)-O(28) | 1.996(6)   |
| V(5)-O(17)    | 1.938(5)   | V(14)-O(32) | 2.003(5)   |
| V(5)-O(18)    | 1.958(5)   | V(14)-V(15) | 2.9943(19) |
| V(5)-O(14)    | 2.006(5)   | V(15)-O(36) | 1.617(5)   |
| V(5)-V(7)     | 2.8956(16) | V(15)-O(33) | 1.899(5)   |
| V(6)-O(22)    | 1.609(5)   | V(15)-O(47) | 1.908(6)   |
| V(6)-O(46)    | 1.913(5)   | V(15)-O(28) | 1.985(5)   |
| V(6)-O(18)    | 1.936(5)   | V(15)-O(29) | 2.010(5)   |
| V(6)-O(7)     | 1.983(5)   | Si(1)-O(39) | 1.580(5)   |
| V(6)-O(21)    | 1.984(5)   | Si(1)-O(10) | 1.634(5)   |
| V(6)-V(7)     | 2.9902(16) | Si(1)-O(37) | 1.644(5)   |
| V(7)-O(19)    | 1.602(5)   | Si(1)-O(2)  | 1.661(5)   |
| V(7)-O(18)    | 1.931(5)   | Si(2)-O(38) | 1.609(5)   |
| V(7)-O(17)    | 1.939(5)   | Si(2)-O(14) | 1.623(5)   |
| V(7)-O(20)    | 1.983(5)   | Si(2)-O(7)  | 1.636(5)   |
| V(7)-O(21)    | 2.000(5)   | Si(2)-O(37) | 1.636(5)   |
| V(7)-V(8)     | 3.0396(16) | Si(3)-O(40) | 1.585(6)   |
| V(8)-O(23)    | 1.605(6)   | Si(3)-O(32) | 1.633(5)   |
| V(8)-O(24)    | 1.930(5)   | Si(3)-O(21) | 1.644(5)   |
| V(8)-O(17)    | 1.944(5)   | Si(3)-O(41) | 1.648(5)   |
| V(8)-O(47)    | 1.961(5)   | Si(4)-O(42) | 1.584(6)   |
| V(8)-O(20)    | 1.998(5)   | Si(4)-O(20) | 1.627(5)   |
| V(8)-V(10)    | 2.9049(17) | Si(4)-O(28) | 1.642(6)   |
| V(9)-O(26)    | 1.604(6)   | Si(4)-O(41) | 1.649(6)   |
| V(9)-O(24)    | 1.928(5)   | Si(5)-O(43) | 1.594(6)   |
| V(9)-O(15)    | 1.936(5)   | Si(5)-O(34) | 1.632(5)   |
| V(9)-O(12)    | 1.953(5)   | Si(5)-O(44) | 1.634(5)   |
| Co(1)-O(42)#1 | 2.212(6)   | Si(5)-O(29) | 1.636(5)   |
| Co(1)-N(7)    | 2.25(2)    | Si(6)-O(45) | 1.589(6)   |
| Co(1)-N(6)    | 2.303(11)  | Si(6)-O(25) | 1.636(5)   |
| Co(1)-O(1W)   | 2.349(9)   | Si(6)-O(11) | 1.645(5)   |
| Co(1)-O(1)#2  | 2.361(5)   | Si(6)-O(44) | 1.646(5)   |
| Co(1)-O(36)#1 | 2.711(6)   |             |            |

Symmetry transformations used to generate equivalent atoms:

(#1): x+1,y,z; (#2): x,-y+1/2,z-1/2.

**Table S2** Bond balance sum calculations for Compound 1 and 2

| Compound 1 |            |      |            |      |            |      |            |
|------------|------------|------|------------|------|------------|------|------------|
| Atom       | $\Sigma s$ | Atom | $\Sigma s$ | Atom | $\Sigma s$ | Atom | $\Sigma s$ |
| Si(1)      | 4.074      | V(1) | 4.158      | V(4) | 4.174      | V(7) | 4.142      |
| Si(2)      | 3.995      | V(2) | 4.139      | V(5) | 4.184      | V(8) | 4.223      |
| Si(3)      | 3.951      | V(3) | 4.148      | V(6) | 4.181      | V(9) | 5.217      |

  

| Compound 2 |            |      |            |       |            |       |            |
|------------|------------|------|------------|-------|------------|-------|------------|
| Atom       | $\Sigma s$ | Atom | $\Sigma s$ | Atom  | $\Sigma s$ | Atom  | $\Sigma s$ |
| Si(1)      | 3.954      | V(1) | 4.116      | V(7)  | 4.136      | V(13) | 4.154      |
| Si(2)      | 3.980      | V(2) | 4.104      | V(8)  | 4.154      | V(14) | 4.138      |
| Si(3)      | 3.972      | V(3) | 4.163      | V(9)  | 4.194      | V(15) | 4.166      |
| Si(4)      | 3.993      | V(4) | 4.232      | V(10) | 4.175      | Co(1) | 1.897      |
| Si(5)      | 4.007      | V(5) | 4.093      | V(11) | 4.094      |       |            |
| Si(6)      | 3.957      | V(6) | 4.167      | V(12) | 4.112      |       |            |
